# Supplementary material for: Efficient computation of electrograms and ECGs in human whole heart simulations using a reaction-eikonal model☆
Source: PubMed Central journal article supplement — J Comput Phys. Author manuscript; Available in PMC 2017 Oct 1. (PMC5555399; doi:10.1016/j.jcp.2017.06.020), 2017-10-01
Supplement: NIHMS73303-supplement-Appendix_A.pdf [file NIHMS73303-supplement-Appendix_A.pdf]

## Appendix A. The foot of a propagated action potential

Propagation of a planar wavefront along a given direction  $x$  in a homogeneous medium can be described by the one-dimensional monodomain equation given as

$$\sigma_x \frac{\partial^2 V_m}{\partial x^2} = \beta \left( C_m \frac{\partial V_m}{\partial t} + I_{\text{ion}} \right). \quad (37)$$

Under such conditions a depolarization wavefront propagates at a sufficient distance to any tissue boundary uniformly at a constant velocity without any spatial variation in the shape of the wavefront. Mathematically, this can be expressed as

$$V_m(x, t) = V_m(x - vt) \quad (38)$$

or, equivalently, as a differential equation by

$$\frac{\partial^2 V_m}{\partial x^2} = \frac{1}{v^2} \frac{\partial^2 V_m}{\partial t^2} \quad (39)$$

where  $v$  denotes the conduction velocity of the propagating wavefront. Under subthreshold conditions, that is, the range of transmembrane voltages  $V_m$  below the firing threshold,  $V_{\text{th}}$ , referred to as the foot of the action potential, the membrane behavior is characterized as passive and linear. The transmembrane current  $I_m$  is composed then of a capacitive current  $I_c$

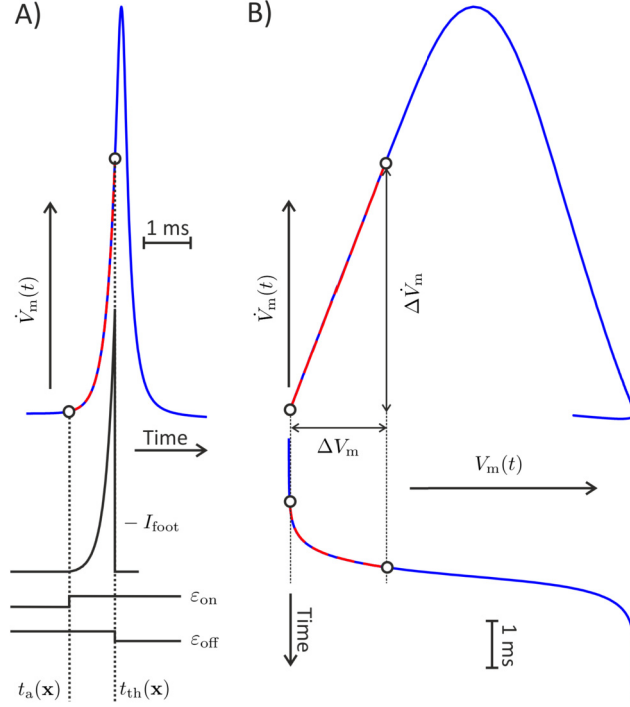

**Fig. 10.** Fitting of current  $I_{\text{foot}}$ . Shown are traces derived from a simulated propagated action potential (solid blue lines) and traces derived from the fitted current  $I_{\text{foot}}$  (red dashed lines). Fitting yielded  $A = 0.91$  mV and  $\tau_F = 0.25$  ms. A) Trace of  $\dot{V}_m$ , foot current  $-I_{\text{foot}}/C_m$  and the step functions  $\varepsilon_{\text{on}} = \varepsilon(t - t_a(x))$  and  $\varepsilon_{\text{off}} = \varepsilon(t_{\text{th}}(x) - t)$ . B) Phase plane trajectory of propagated action potential. During the foot of the action potential the ratio  $\Delta\dot{V}_m/\Delta V_m$  is  $\approx$  constant. (For interpretation of the references to color in this figure legend, the reader is referred to the web version of this article.)

and an ionic current  $I_{\text{ion}}$  where  $I_{\text{ion}} = G_m V_m$  is ohmic. Thus using (37) with (39) the time course of the action potential at any given point in space can be described by

$$\frac{\sigma_x}{\beta G_m v^2} \frac{\partial^2 V_m}{\partial t^2} - R_m C_m \frac{\partial V_m}{\partial t} - V_m = 0. \quad (40)$$

Using the definition of the time constant of the membrane,  $\tau_m$ , and the space constant along the direction  $x$ ,  $\lambda_x$ ,

$$\tau_m = R_m C_m; \quad \lambda_x = \sqrt{\frac{\sigma_x}{\beta G_m}} \quad (41)$$

yields the differential equation of the foot of a propagating action potential

$$\left(\frac{\lambda_x}{v}\right)^2 \frac{\partial^2 V_m}{\partial t^2} - \tau_m \frac{\partial V_m}{\partial t} - V_m = 0 \quad (42)$$

for which an analytical solution is found as

$$V_m = A \cdot \exp\left[\left(\frac{\tau_m v^2}{2\lambda_x^2} + \frac{v}{2\lambda_x} \sqrt{\frac{\tau_m^2 v^2}{\lambda_x^2} + 4}\right) t\right] + B \cdot \exp\left[\left(\frac{\tau_m v^2}{2\lambda_x^2} - \frac{v}{2\lambda_x} \sqrt{\frac{\tau_m^2 v^2}{\lambda_x^2} + 4}\right) t\right]. \quad (43)$$

In the case of a propagating depolarization wavefront the foot of the action potential traverses its rising phase implying that  $B = 0$  must hold. Further, in general the assumption  $\tau_m^2 v^2 / \lambda_x^2 \gg 4$  holds, allowing to represent the foot of the action potential as a mono-exponential process

$$V_m = A e^{kt} \quad \text{with} \quad k = \frac{\tau_m v^2}{\lambda_x^2} = \frac{1}{\tau_F}, \quad (44)$$

where  $\tau_F$  denotes the time constant of the foot of the action potential. The time constant  $\tau_F$  can be determined experimentally [40] or from a simulated propagated action potential through phase plane analysis (Fig. 10). At the arrival time of a propagating depolarization wavefront at the location  $x$  in space,  $t_a(x)$ , the change in transmembrane voltage during the foot of the action potential is described by a function

$$V_m(x, t) = \left[ A \cdot e^{\frac{t-t_a(x)}{\tau_F}} + B \right] \cdot \varepsilon_{\text{on}}(t - t_a(x)) \cdot \varepsilon_{\text{off}}(t_{\text{th}}(x) - t), \quad (45)$$

where  $\varepsilon_{\text{on}}$  and  $\varepsilon_{\text{off}}$  are step functions delimiting the time interval  $[t_a(x), t_{\text{th}}(x)]$  of the foot of the action potential marking the onset of the AP foot and the instant of  $V_m$  crossing a given transmembrane voltage threshold at location  $x$ . The change of  $V_m$  during the foot is driven by the foot current  $I_{\text{foot}}$  given as

$$I_{\text{foot}} = I_{\text{ion}} - \nabla \cdot \sigma \nabla V_m = -C_m \frac{dV_m}{dt} = -\frac{A}{\tau_F} \cdot e^{\frac{t-t_a(x)}{\tau_F}} \cdot \varepsilon(t - t_a(x)) \cdot \varepsilon(t_{\text{th}}(x) - t), \quad (46)$$

which represents the combined effect of electronic currents due to diffusion, represented by  $\nabla \cdot \sigma \nabla V_m$ , and the ionic currents,  $I_{\text{ion}}$  where  $I_{\text{ion}} \approx 0$  can be assumed during the foot phase of an action potential. The constant  $A$  of the current  $I_{\text{foot}}$  can be determined by fitting the function in Eq. (46) to the foot of a propagated action potential (Fig. 10).

According to Eq. (44)  $\tau_F$  depends on the velocity of propagation, suggesting that the foot of the action potential may vary as a function of direction of propagation. However, taking into account the known proportionality relation for conduction velocity

$$v_x \propto K \sqrt{\frac{\sigma_x}{\beta}} \quad (47)$$

it becomes apparent, by inserting Eqs. (47) and (41) into Eq. (44) that the ratio  $v_x/\lambda_x$  is a constant factor  $K\sqrt{G_m}$ . Thus the potentially space-dependent terms cancel out in Eq. (44) and the time course of the foot of the action potential is governed by local membrane properties, that is, the conductivity  $G_m$  of the membrane under subthreshold conditions.
